# Supplementary material for: Systematic study of cis-antisense miRNAs in animal species reveals miR-3661 to target PPP2CA in human cells
Source: PubMed Central journal article supplement — RNA. 2016 Jan;22(1):87–95. doi: 10.1261/rna.052894.115 (PMC4691837; doi:10.1261/rna.052894.115), 2016-01
Supplement: supp_052894.115_SuppMaterial.pdf [file supp_052894.115_SuppMaterial.pdf]

**Table S1.** Genome-wide potential *cis*-antisense miRNAs and their antisense transcribed genes of *Mus musculus*.

| No. | miRNA             | Name of antisense gene | Type of antisense gene | Complementary sites in the gene <sup>a</sup> | Chromosome |
|-----|-------------------|------------------------|------------------------|----------------------------------------------|------------|
| 1   | mmu-miR-5126      | Dner                   | Protein-coding         | 5' UTR                                       | 1          |
| 2   | mmu-miR-6340      | Rab22a                 | Protein-coding         | CDS-3' UTR                                   | 2          |
| 3   | mmu-miR-1905      | Mex3a                  | Protein-coding         | CDS                                          | 3          |
| 4   | mmu-miR-8099      | Lysmd1                 | Protein-coding         | 3' UTR                                       | 3          |
| 5   | mmu-miR-1895      | Cxxc4                  | Protein-coding         | CDS                                          | 3          |
| 6   | mmu-miR-6376      | Rpn1                   | Protein-coding         | 3' UTR                                       | 6          |
| 7   | mmu-miR-292b-5p   | D7Ert143e              | Non-coding             | Exon                                         | 7          |
| 8   | mmu-miR-292b-3p   | D7Ert143e              | Non-coding             | Exon                                         | 7          |
| 9   | mmu-miR-7668-5p   | Zfp27                  | Protein-coding         | 5' UTR                                       | 7          |
| 10  | mmu-miR-762       | Bcl7c                  | Protein-coding         | 5' UTR                                       | 7          |
| 11  | mmu-miR-1957b     | Wdr59                  | Protein-coding         | 3' UTR                                       | 8          |
| 12  | mmu-miR-6244      | Zc3h12c                | Protein-coding         | CDS                                          | 9          |
| 13  | mmu-miR-130c      | Kdelc2                 | Protein-coding         | 3' UTR                                       | 9          |
| 14  | mmu-miR-135a-5p   | Glyctk                 | Protein-coding         | 3' UTR                                       | 9          |
| 15  | mmu-miR-135a-1-3p | Glyctk                 | Protein-coding         | 3' UTR                                       | 9          |
| 16  | mmu-miR-3968      | Trim80                 | Protein-coding         | CDS                                          | 11         |
| 17  | mmu-miR-431-5p    | Rtl1                   | Protein-coding         | CDS                                          | 12         |
| 18  | mmu-miR-431-3p    | Rtl1                   | Protein-coding         | CDS                                          | 12         |
| 19  | mmu-miR-433-5p    | Rtl1                   | Protein-coding         | CDS                                          | 12         |
| 20  | mmu-miR-433-3p    | Rtl1                   | Protein-coding         | CDS                                          | 12         |
| 21  | mmu-miR-127-5p    | Rtl1                   | Protein-coding         | CDS                                          | 12         |
| 22  | mmu-miR-127-3p    | Rtl1                   | Protein-coding         | CDS                                          | 12         |
| 23  | mmu-miR-434-5p    | Rtl1                   | Protein-coding         | CDS                                          | 12         |
| 24  | mmu-miR-434-3p    | Rtl1                   | Protein-coding         | CDS                                          | 12         |
| 25  | mmu-miR-432       | Rtl1                   | Protein-coding         | CDS                                          | 12         |
| 26  | mmu-miR-136-5p    | Rtl1                   | Protein-coding         | CDS                                          | 12         |
| 27  | mmu-miR-136-3p    | Rtl1                   | Protein-coding         | CDS                                          | 12         |
| 28  | mmu-miR-1896      | Zscan26                | Protein-coding         | CDS                                          | 13         |
| 29  | mmu-miR-3074-5p   | 201011101Rik           | Protein-coding         | 3' UTR                                       | 13         |
| 30  | mmu-miR-3074-1-3p | 201011101Rik           | Protein-coding         | 3' UTR                                       | 13         |
| 31  | mmu-miR-6363      | 5330426P16Rik          | Non-coding             | Exon                                         | 16         |
| 32  | mmu-miR-3082-5p   | Jmjd8                  | Protein-coding         | 3' UTR                                       | 17         |
| 33  | mmu-miR-3082-3p   | Jmjd8                  | Protein-coding         | 3' UTR                                       | 17         |
| 34  | mmu-miR-1901      | Cables1                | Protein-coding         | CDS                                          | 18         |
| 35  | mmu-miR-6357      | Poli                   | Protein-coding         | CDS                                          | 18         |
| 36  | mmu-miR-3620-5p   | Alas2                  | Protein-coding         | 5' UTR                                       | X          |

<sup>a</sup>Complementary sites in the gene denotes the sites in the gene that a miRNA might bind it with perfect matches. For protein-coding genes, four types of complementary sites, that is 5' UTR, 3' UTR, CDS and CDS-3' UTR, are involved. CDS-3'UTR denotes that the complementary sites are across part of CDS and 3'UTR. For non-coding genes, only Exon is involved.

**Table S2.** Genome-wide potential *cis*-antisense miRNAs and their antisense transcribed genes of *Drosophila*

| No. | miRNA            | Name of antisense gene | Type of antisense gene | Complementary sites in the gene <sup>a</sup> | Chromosome |
|-----|------------------|------------------------|------------------------|----------------------------------------------|------------|
| 1   | dme-miR-4970-5p  | CG6729                 | Protein-coding         | CDS                                          | 2L         |
| 2   | dme-miR-4976-5p  | CG15236                | Protein-coding         | CDS                                          | 2R         |
| 3   | dme-miR-4976-3p  | CG15236                | Protein-coding         | CDS                                          | 2R         |
| 4   | dme-miR-9379-5p  | CG30485                | Protein-coding         | 3' UTR                                       | 2R         |
| 5   | dme-miR-9379-3p  | CG30485                | Protein-coding         | 3' UTR                                       | 2R         |
| 6   | dme-miR-4979-5p  | Sesn                   | Protein-coding         | 3' UTR                                       | 2R         |
| 7   | dme-miR-4979-3p  | Sesn                   | Protein-coding         | 3' UTR                                       | 2R         |
| 8   | dme-miR-9380-5p  | CG7352                 | Protein-coding         | CDS                                          | 3R         |
| 9   | dme-miR-9380-3p  | CG7352                 | Protein-coding         | CDS                                          | 3R         |
| 10  | dme-miR-iab-8-5p | iab-4                  | Non-coding             | Exon                                         | 3R         |
| 11  | dme-miR-iab-8-3p | iab-4                  | Non-coding             | Exon                                         | 3R         |
| 12  | dme-miR-4948-5p  | Aph-4                  | Protein-coding         | CDS                                          | 3R         |
| 13  | dme-miR-4948-3p  | Aph-4                  | Protein-coding         | CDS                                          | 3R         |
| 14  | dme-miR-978-3p   | Grip84                 | Protein-coding         | 3' UTR                                       | X          |
| 15  | dme-miR-978-5p   | Grip84                 | Protein-coding         | 3' UTR                                       | X          |
| 16  | dme-miR-979-3p   | Grip84                 | Protein-coding         | 3' UTR                                       | X          |
| 17  | dme-miR-979-5p   | Grip84                 | Protein-coding         | 3' UTR                                       | X          |

*melanogaster*.

<sup>a</sup>Complementary sites in the gene denotes the sites in the gene that a miRNA might bind it with perfect matches. For protein-coding genes, three types of complementary sites, that is 5' UTR, 3' UTR and CDS, are involved. For non-coding genes, only Exon is involved.

**Table S3.** Genome-wide potential *cis*-antisense miRNAs and their antisense transcribed genes of *Caenorhabditis elegans*.

| No. | miRNA           | Name of antisense gene | Type of antisense gene | Complementary sites in the gene <sup>a</sup> | Chromosome |
|-----|-----------------|------------------------|------------------------|----------------------------------------------|------------|
| 1   | cel-miR-50-5p   | Y71G12B.36             | Non-coding             | Exon                                         | I          |
| 2   | cel-miR-50-3p   | Y71G12B.36             | Non-coding             | Exon                                         | I          |
| 3   | cel-miR-1-3p    | T09B4.14               | Non-coding             | Exon                                         | I          |
| 4   | cel-miR-1-5p    | T09B4.14               | Non-coding             | Exon                                         | I          |
| 5   | cel-miR-79-3p   | C12C8.6                | Non-coding             | Exon                                         | I          |
| 6   | cel-miR-79-5p   | C12C8.6                | Non-coding             | Exon                                         | I          |
| 7   | cel-miR-71-5p   | F16A11.6               | Non-coding             | Exon                                         | I          |
| 8   | cel-miR-71-3p   | F16A11.6               | Non-coding             | Exon                                         | I          |
| 9   | cel-miR-8195-5p | tsr-1                  | Protein-coding         | CDS                                          | II         |
| 10  | cel-miR-8195-3p | tsr-1                  | Protein-coding         | CDS                                          | II         |
| 11  | cel-lin-4-5p    | F59G1.10               | Non-coding             | Exon                                         | II         |
| 12  | cel-lin-4-3p    | F59G1.10               | Non-coding             | Exon                                         | II         |
| 13  | cel-miR-60-5p   | C32D5.15               | Non-coding             | Exon                                         | II         |
| 14  | cel-miR-60-3p   | C32D5.15               | Non-coding             | Exon                                         | II         |
| 15  | cel-miR-85-3p   | F49E12.14              | Non-coding             | Exon                                         | II         |
| 16  | cel-miR-85-5p   | F49E12.14              | Non-coding             | Exon                                         | II         |
| 17  | cel-miR-252-5p  | W02B12.17              | Non-coding             | Exon                                         | II         |
| 18  | cel-miR-252-3p  | W02B12.17              | Non-coding             | Exon                                         | II         |
| 19  | cel-miR-45-3p   | ZK930.13               | Non-coding             | Exon                                         | II         |
| 20  | cel-miR-45-5p   | ZK930.13               | Non-coding             | Exon                                         | II         |
| 21  | cel-miR-42-5p   | ZK930.12               | Non-coding             | IGR-Exon                                     | II         |
| 22  | cel-miR-42-3p   | ZK930.12               | Non-coding             | Exon                                         | II         |
| 23  | cel-miR-43-3p   | ZK930.12               | Non-coding             | Exon                                         | II         |
| 24  | cel-miR-43-5p   | ZK930.12               | Non-coding             | Exon                                         | II         |
| 25  | cel-miR-234-3p  | C13B4.6                | Non-coding             | Exon                                         | II         |
| 26  | cel-miR-234-5p  | C13B4.6                | Non-coding             | Exon                                         | II         |
| 27  | cel-miR-80-5p   | K01F9.6                | Non-coding             | Exon                                         | III        |
| 28  | cel-miR-80-3p   | K01F9.6                | Non-coding             | Exon                                         | III        |
| 29  | cel-miR-90-3p   | K01F9.7                | Non-coding             | Exon                                         | III        |
| 30  | cel-miR-90-5p   | K01F9.7                | Non-coding             | Exon                                         | III        |
| 31  | cel-miR-46-5p   | ZK525.4                | Non-coding             | Exon                                         | III        |
| 32  | cel-miR-46-3p   | ZK525.4                | Non-coding             | Exon                                         | III        |
| 33  | cel-miR-124-5p  | C29E6.8                | Non-coding             | Exon                                         | IV         |
| 34  | cel-miR-124-3p  | C29E6.8                | Non-coding             | IGR-Exon                                     | IV         |
| 35  | cel-miR-52-5p   | Y37A1B.335             | Non-coding             | Exon                                         | IV         |
| 36  | cel-miR-52-3p   | Y37A1B.335             | Non-coding             | Exon                                         | IV         |
| 37  | cel-miR-1833    | Y41E3.458              | Non-coding             | Exon                                         | IV         |
| 38  | cel-miR-255-3p  | F08F3.13               | Non-coding             | Exon                                         | V          |

(continued on next page)

| No. | miRNA           | Name of antisense gene | Type of antisense gene | Complementary sites in the gene <sup>a</sup> | Chromosome |
|-----|-----------------|------------------------|------------------------|----------------------------------------------|------------|
| 39  | cel-miR-255-5p  | F08F3.13               | Non-coding             | Exon                                         | V          |
| 40  | cel-miR-253-5p  | F44E7.15               | Non-coding             | Exon                                         | V          |
| 41  | cel-miR-253-3p  | F44E7.15               | Non-coding             | Exon                                         | V          |
| 42  | cel-miR-259-5p  | F25D1.9                | Non-coding             | Exon                                         | V          |
| 43  | cel-miR-259-3p  | F25D1.9                | Non-coding             | Exon                                         | V          |
| 44  | cel-miR-87-3p   | F10C2.11               | Non-coding             | Exon                                         | V          |
| 43  | cel-miR-87-5p   | F10C2.11               | Non-coding             | Exon                                         | V          |
| 44  | cel-miR-8210-5p | C54G10.5               | Non-coding             | Exon                                         | V          |
| 45  | cel-miR-8210-3p | C54G10.5               | Non-coding             | IGR-Exon                                     | V          |
| 46  | cel-miR-74-5p   | T24D8.16               | Non-coding             | IGR-Exon                                     | X          |
| 47  | cel-miR-74-5p   | T24D8.16               | Non-coding             | Exon                                         | X          |
| 48  | cel-miR-271     | C04F6.8                | Non-coding             | Exon                                         | X          |

<sup>a</sup>Complementary sites in the gene denotes the sites in the gene that a miRNA might bind it with perfect matches. There are three types of complementary sites are involved, CDS for protein-coding genes and IGR-Exon and Exon for non-coding genes, respectively. IGR stands for intergenic region.

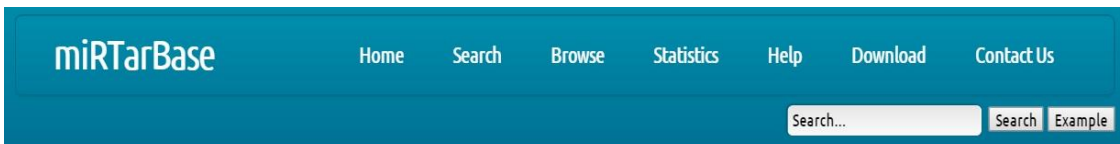

Page 1 of 1 1

| ID                         | Species (miRNA) | Species (Target) | miRNA           | Target  | Validation methods |              |      |                      |     |        |       | Sum | # of papers |
|----------------------------|-----------------|------------------|-----------------|---------|--------------------|--------------|------|----------------------|-----|--------|-------|-----|-------------|
|                            |                 |                  |                 |         | Strong evidence    |              |      | Less strong evidence |     |        |       |     |             |
|                            |                 |                  |                 |         | Reporter assay     | Western blot | qPCR | Microarray           | NGS | pSILAC | Other |     |             |
| <a href="#">MIRT000707</a> | Homo sapiens    | Homo sapiens     | hsa-miR-135a-5p | JAK2    | ✓                  | ✓            |      |                      |     |        | ✓     | 3   | 1           |
| <a href="#">MIRT001167</a> | Homo sapiens    | Homo sapiens     | hsa-miR-135a-5p | NR3C2   | ✓                  |              | ✓    |                      |     |        | ✓     | 3   | 1           |
| <a href="#">MIRT001941</a> | Homo sapiens    | Homo sapiens     | hsa-miR-135a-5p | APC     | ✓                  |              | ✓    |                      |     |        | ✓     | 3   | 1           |
| <a href="#">MIRT006793</a> | Homo sapiens    | Homo sapiens     | hsa-miR-135a-5p | HOXA10  | ✓                  |              |      |                      |     |        |       | 1   | 1           |
| <a href="#">MIRT007105</a> | Homo sapiens    | Homo sapiens     | hsa-miR-135a-5p | MYC     | ✓                  | ✓            |      |                      |     |        |       | 2   | 1           |
| <a href="#">MIRT035578</a> | Homo sapiens    | Homo sapiens     | hsa-miR-135a-5p | ALOX5AP |                    |              |      |                      |     |        | ✓     | 1   | 1           |

Page 1 of 1 1

Figure S1. A snapshot of experimentally validated targets of hsa-miR-135a-5p from miRTarBase (Hsu et al., 2014)

#### SUPPLEMENTARY REFERENCE:

Hsu, S-D, Tseng, Y-T, Shrestha, S, Lin, Y-L, Khaleel, A, Chou, C-H, Chu, C-F, Huang, H-Y, Lin, C-M, Ho, S-Y, *et al.* 2014. miRTarBase update 2014: an information resource for experimentally validated miRNA-target interactions. *Nucleic Acids Res* **42**, D78-D85.
